# Supplementary material for: Safety evaluation on low-molecular-weight hydroxyethyl starch for volume expansion therapy in pediatric patients: a meta-analysis of randomized controlled trials
Source: PubMed Central journal article supplement (PMC4391127; doi:10.1186/s13054-015-0815-y), 2015-03-10
Supplement: 13054_2015_815_MOESM1_ESM.pdf [file 13054_2015_815_MOESM1_ESM.pdf]

## Appendix. Search strategy

### A, Cochrane Library Issue 1, 2014

- #1. MeSH descriptor “Infant,Newborn”, Child, “Child,Preschool”, Adolescent explode all trees
- #2. newborn OR infant OR child\* OR ‘preschool child\*’ OR ‘school child\*’ OR adolescent OR juvenile OR neonate OR pediatric
- #3. (#1 OR #2)
- #4. MeSH descriptor Hydroxyethyl Starch Derivatives explode all trees
- #5. “hydroxyethyl\* starch\*” OR hes\* or starch\* OR tetrastarch OR tetraspan OR pentastarch OR voluven or hetastarch\* OR “haes steril” OR venofundin OR Elohes OR hextend OR “Hydroxyethyl Starch Derivatives” OR Hemohes OR Hespan OR Plasmasteril OR Hydroxyethyl Starch 130-0.4
- #6. (#4 OR #5)
- #7. (#3 AND #6)

### B, MEDLINE (Pubmed) 1980 to January, 2014

((((((((((((((((((("Hydroxyethyl Starch Derivatives"[Mesh]) OR hydroxyethyl starch) OR Hydroxyethylated Starches) OR 2-Hydroxyethyl Starches) OR Derivatives, Hydroxyethyl Starch) OR Starches, Hydroxyethylated) OR HAES-steril) OR Fresenius Brand of Pentastarch) OR Hemohes) OR Braun Brand of Pentastarch) OR Hespan) OR Plasmasteril) OR Hydroxyethyl Starch 130-0.4) OR Pentafraction) OR Pentaspan) OR Pentastarch) OR Hetastarch)) AND (((((((("Child"[Mesh]) OR child) OR juvenile) OR children) OR infant) OR neonate) OR newborn) OR pediatric)) AND (((((((((#42) OR randomised controlled trial[Publication Type]) OR controlled clinical trial[Publication Type]) OR randomised[Title/Abstract]) OR placebo[Title/Abstract]) OR drug therapy[MeSH Subheading]) OR randomly[Title/Abstract]) OR trial[Title/Abstract]) OR groups[Title/Abstract]) NOT ((animals[MeSH Terms]) NOT humans[MeSH Terms]))

### C, Embase(OvidSP) 1974 to January, 2014

1. (Newborn or infant or child\* or ‘preschool child\*’ or ‘school child\*’ or adolescent or juvenile or neonate or pediatric).af.
2. exp newborn/ or exp juvenile/ or exp newborn/ or exp infant/ or exp preschool child/ or exp school child/ or exp adolescent/
3. 1 or 2
4. ('hydroxyethyl\* starch\*' or hes\* or starch\* or tetrastarch or tetraspan or pentastarch or voluven or hetastarch\* or 'haes steril' or venofundin or Elohes or hextend or ‘Hydroxyethyl Starch Derivatives’ or Hemohes or Hespan or Plasmasteril or Hydroxyethyl Starch 130-0.4).af.
5. exp hetastarch/
6. 4 or 5
7. 3 and 6
8. (random\* OR factorial\* OR crossover\* OR placebo\*).af.

9. exp crossover-procedure/ or exp double-blind procedure/ or exp randomised controlled trial/  
or single-blind procedure/

10.8 or 9

11.7 and 10
