# Supplementary material for: Safety evaluation on low-molecular-weight hydroxyethyl starch for volume expansion therapy in pediatric patients: a meta-analysis of randomized controlled trials
Source: PubMed Central journal article supplement (PMC4391127; doi:10.1186/s13054-015-0815-y), 2015-03-10

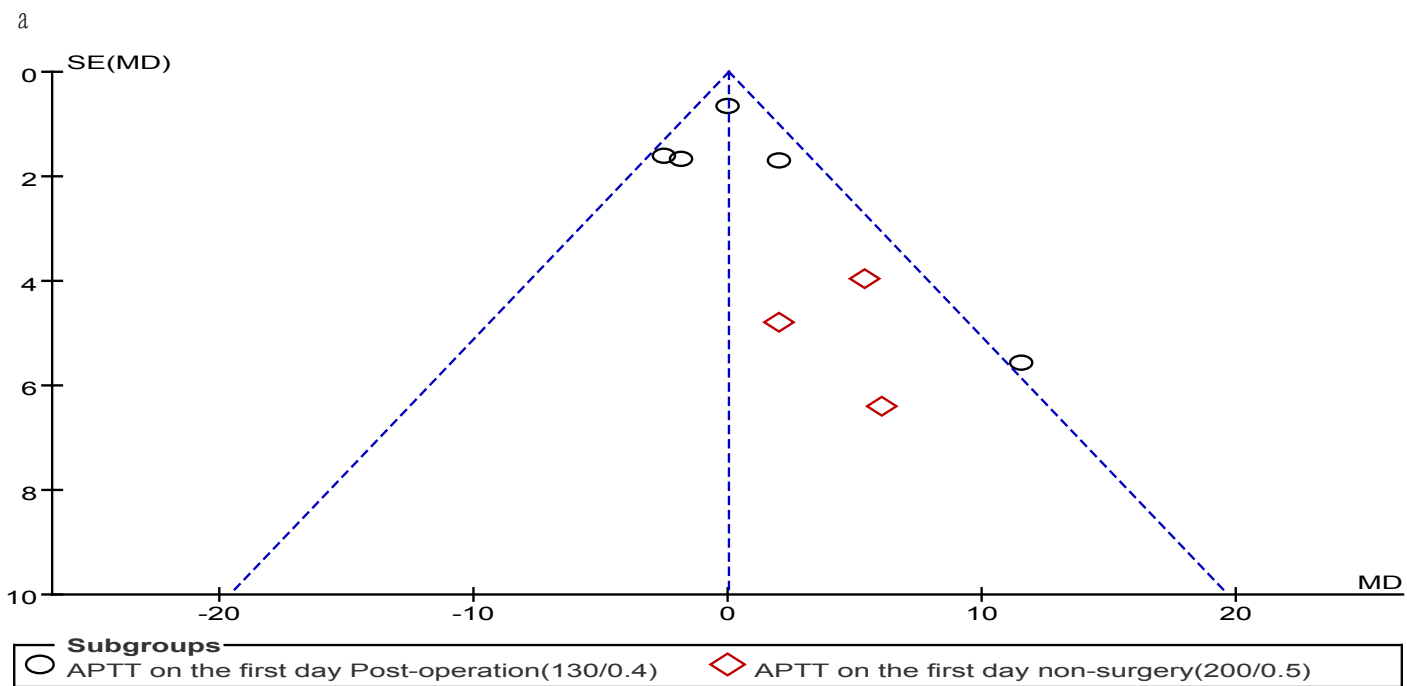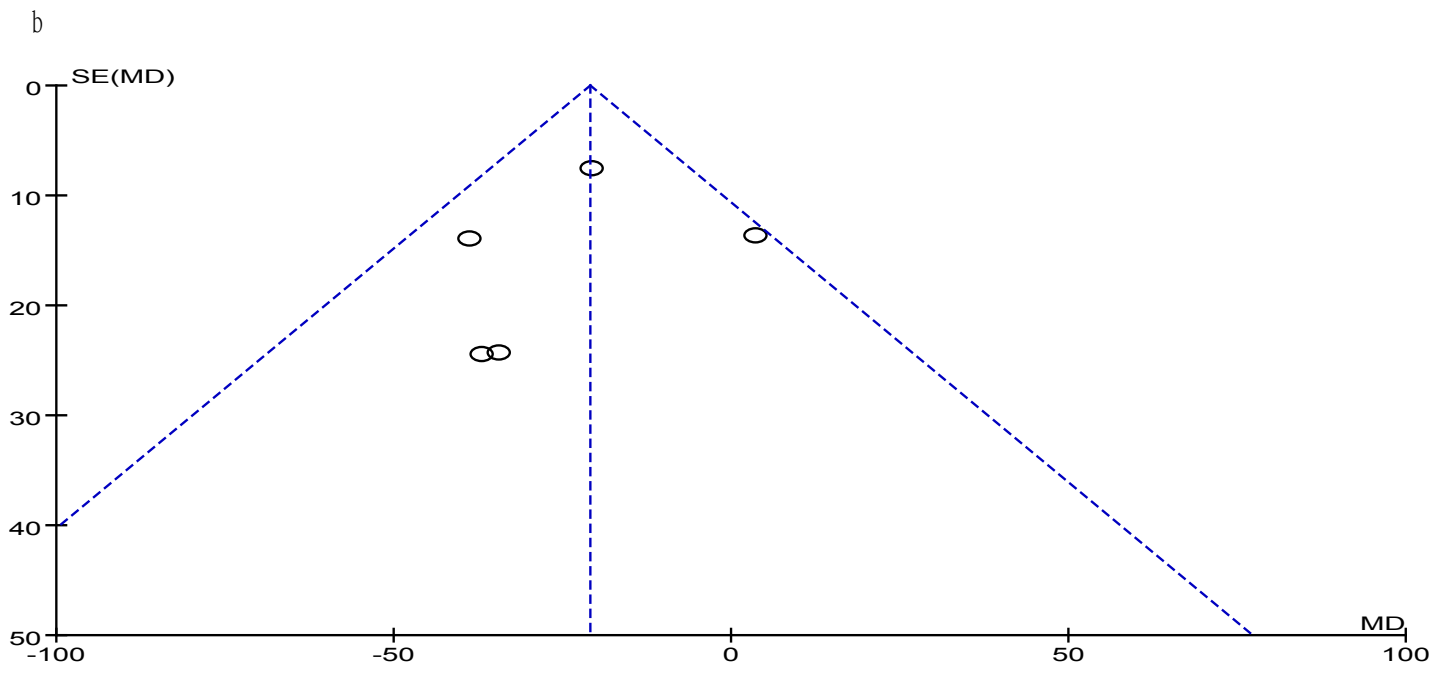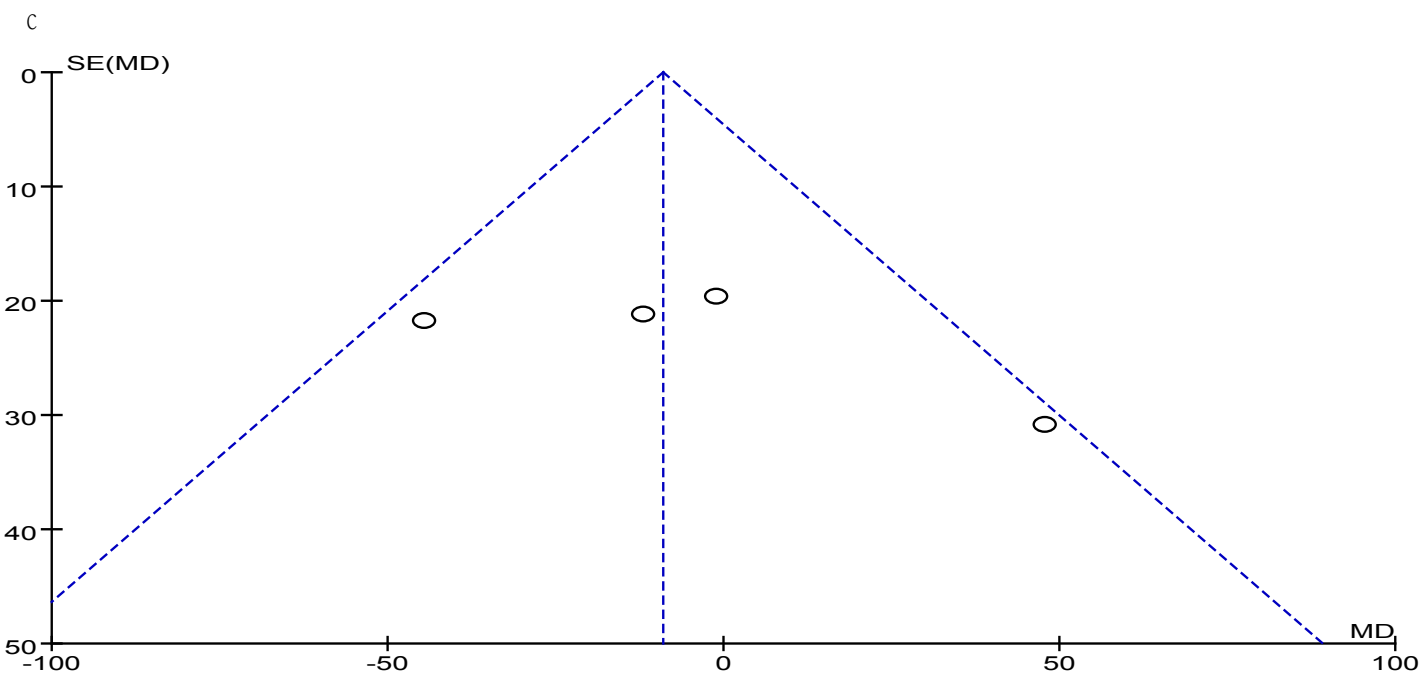

Supplement: 13054_2015_815_MOESM4_ESM.pdf [file 13054_2015_815_MOESM4_ESM.pdf]
